# Supplementary material for: Luminescent materials containing multiple benzoxaphosphole units
Source: Royal Society of Chemistry journal article supplement (doi:10.1039/c4cc05259e), 2014-01-01
Supplement: c4cc05259e1.pdf [file c4cc05259e1.pdf]

## Luminescent materials containing multiple benzoxaphosphole units

Shanshan Wu,<sup>a</sup> Arnold L. Rheingold<sup>b</sup> and John D. Protasiewicz\*<sup>a</sup>

<sup>a</sup> *Department of Chemistry, Case Western Reserve University, Cleveland, Ohio, 44106 USA.;  
Corresponding author: Tel: 216-368-5060; E-mail: [protasiewicz@case.edu](mailto:protasiewicz@case.edu).*

<sup>b</sup> *Department of Chemistry and Biochemistry, University of California, San Diego, La Jolla,  
California 92093, USA.; E-mail: [arheingold@ucsd.edu](mailto:arheingold@ucsd.edu).*

### Table of Contents

|                                                |     |
|------------------------------------------------|-----|
| 1. General considerations.....                 | S2  |
| 2. Experimental.....                           | S3  |
| 3. X-ray crystallographic data.....            | S7  |
| 4. NMR spectra.....                            | S13 |
| 5. UV-vis absorption and emission spectra..... | S19 |
| 6. DFT calculation.....                        | S23 |
| 7. References.....                             | S32 |

## 1. General considerations

All operations were performed under nitrogen atmosphere, using Schlenk line or within a Vacuum Atmospheres MBraun glove box unless otherwise stated. Tetrahydrofuran, hexanes, and toluene were dried by distillation from sodium benzophenone ketyl. Triethylamine was purified by distillation and degassed with nitrogen prior to use. Hexanes was dried by passing through neutral alumina column and degassed with nitrogen prior to use for UV-vis and fluorescence measurements. Dichloromethane was dried by distillation from CaH<sub>2</sub> prior to use for UV-vis and fluorescence measurements. Terephthaloyl chloride, naphthalene-2,6-dicarbonyl dichloride, thiophene-2,5-dicarbonyl dichloride and 1,3,5-benzenetricarbonyl trichloride were prepared according to the literature.<sup>1</sup> 3,5-di-*tert*-butyl-2-phosphinophenol was synthesized by published procedure.<sup>2</sup> <sup>1</sup>H, <sup>13</sup>C{<sup>1</sup>H} and <sup>31</sup>P{<sup>1</sup>H} NMR spectra were recorded on a Varian INOVA AS-400 or 600 spectrometers, and all chemical shifts are referred to residual CHCl<sub>3</sub> signals (for <sup>1</sup>H and <sup>13</sup>C{<sup>1</sup>H} NMR spectra) or to an external sample of 85% H<sub>3</sub>PO<sub>4</sub> (for <sup>31</sup>P{<sup>1</sup>H} NMR spectra). Melting points were measured on a Mel-temp melting point apparatus. High resolution mass spectrometry was performed by the University of Michigan Mass Spectrometry facility using a VG (Micromass) 70-250-S magnetic sector spectrometer. UV-Vis and fluorescence data were recorded using a Cary 50 Bio UV-Visible spectrophotometer and a Cary Eclipse spectrometer, respectively. Excitation wavelengths were chosen for fluorescence measurements to be at the adsorption maxima for each compound. Anthracene in ethanol was used as the quantum yield standard for **4**, 9,10-diphenylanthracene in cyclohexane was used as the quantum yield standard for **1** and **2**, and fluorescein in 0.1 M NaOH was used as the quantum yield standard for **3**.<sup>3</sup>

## 2. Experimental

### 1,4-Bis(4',6'-di-*tert*-butylbenzoxaphospholy)benzene (1)

To a solution of 3,5-di-*tert*-butyl-2-phosphinophenol (1.3 g, 5.5 mmol) in 10 mL THF was added triethylamine (0.77 mL, 5.5 mmol), followed by a solution of terephthaloyl chloride (0.57 g, 2.8 mmol) in 10 mL THF. The mixture was stirred at room temperature overnight to give a yellow cloudy solution. A white precipitate was removed by filtration and the solvent was removed under vacuum to yield a yellow solid. The solid was dissolved in 10 mL toluene, and the solution was refluxed for 72 hours to yield a yellow cloudy solution. After the reaction was cooled to room temperature, the solvent was removed under vacuum to give a yellow solid. The solid was extracted with hexanes and then the solution was passed through basic alumina twice to give a yellow solution. The solvent was removed *in vacuo* to yield a yellow solid. Yield: 0.43 g (27%). mp: 225-227 °C. <sup>1</sup>H NMR (400 MHz, CDCl<sub>3</sub>): δ 8.07 (s, 4H, Ar), 7.65 (s, 2H, Ar), 7.33 (s, 2H, Ar), 1.61 (s, 18H, *t*-Bu), 1.42 (s, 18H, *t*-Bu). <sup>31</sup>P{<sup>1</sup>H} NMR (161 MHz, CDCl<sub>3</sub>): δ 93.3 (s, 1P). <sup>13</sup>C{<sup>1</sup>H} NMR (150 MHz, CDCl<sub>3</sub>): δ 192.4 (d, *J*<sub>pc</sub> = 55.5 Hz), 161.5, 151.4, 135.4, 135.3, 130.8 (d, *J*<sub>pc</sub> = 46.5 Hz), 125.0, 117.4, 108.1, 37.0, 35.3, 31.5, 31.1. UV (CH<sub>2</sub>Cl<sub>2</sub>): λ<sub>max</sub>/nm 418, 437sh (ε/M<sup>-1</sup>·cm<sup>-1</sup> 11305, 9205). Fluorescence (CH<sub>2</sub>Cl<sub>2</sub>): λ<sub>em</sub>/nm 462, 485sh. Quantum Yield (CH<sub>2</sub>Cl<sub>2</sub>): Φ 0.31. HRMS (EI, 70 ev): m/z 570.2813 (Calc. 570.2817).

### 2,6-Bis(4',6'-di-*tert*-butylbenzoxaphospholy)naphthalene(2)

To a solution of 3,5-di-*tert*-butyl-2-phosphinophenol (1.4 g, 5.9 mmol) in 10 mL THF was added triethylamine (0.83 mL, 5.9 mmol), followed by a solution of naphthalene-2,6-dicarbonyl dichloride (0.75 g, 3.0 mmol) in 10 mL THF. The mixture was stirred at room temperature overnight to produce a yellow cloudy solution. A white precipitate was removed by filtration and the solvent was removed under vacuum to yield a yellow solid. The solid was dissolved in 10 mL toluene, and the solution was refluxed

for 72 hours to give a yellow cloudy solution. After the reaction was cooled to room temperature, the solvent was removed *in vacuo* to give a yellow solid. The solid was extracted with hexanes and then the solution was passed through basic alumina to give a yellow solution. The solvent was removed under vacuum to give a yellow solid. Yield: 0.37 g (20%). mp: 309-312 °C. <sup>1</sup>H NMR (400 MHz, CDCl<sub>3</sub>): δ 8.46 (s, 2H, Ar), 8.15 (m, 2H, Ar), 7.93 (m, 2H, Ar), 7.69 (s, 2H, Ar), 7.34 (s, 2H, Ar), 1.63 (s, 18H, *t*-Bu), 1.43 (s, 18H, *t*-Bu). <sup>31</sup>P{<sup>1</sup>H} NMR (161 MHz, CDCl<sub>3</sub>): δ 95.0 (s, 1P). <sup>13</sup>C{<sup>1</sup>H} NMR (150 MHz, CDCl<sub>3</sub>): δ 192.8 (d, *J*<sub>pc</sub> = 55.5 Hz), 161.6, 151.5, 151.4, 133.9, 132.8, 132.7, 130.7 (d, *J*<sub>pc</sub> = 43.5 Hz), 129.2, 124.2, 122.5, 117.4, 108.1, 37.0, 35.3, 31.5, 31.1. UV (CH<sub>2</sub>Cl<sub>2</sub>): λ<sub>max</sub>/nm 412, 438sh (ε/M<sup>-1</sup>·cm<sup>-1</sup> 11570, 10194). Fluorescence (CH<sub>2</sub>Cl<sub>2</sub>): λ<sub>em</sub>/nm 462sh, 473. Quantum Yield (CH<sub>2</sub>Cl<sub>2</sub>): Φ 0.50. HRMS (EI, 70 ev): m/z 620.2959 (Calc. 620.2973).

### **2,5-Bis(4',6'-di-*tert*-butylbenzoxaphospholy)thiophene (3)**

To a solution of 3,5-di-*tert*-butyl-2-phosphinophenol (1.0 g, 4.2 mmol) in 10 mL THF was added triethylamine (0.59 mL, 4.2 mmol), followed by a solution of thiophene-2,5-dicarbonyl dichloride (0.44 g, 2.1 mmol) in 10 mL THF. The mixture was stirred at room temperature overnight to produce a brown cloudy solution. A white precipitate was removed by filtration and the solvent was removed under vacuum to yield a red solid. The solid was dissolved in 10 mL toluene, and the solution was refluxed overnight to give a red solution. After the reaction was cooled to room temperature, the solvent was removed under vacuum to give a red solid. The solid was extracted with hexanes and then the solution was passed through basic alumina three times to give a red solution. The solvent was removed *in vacuo* to yield a red solid. Yield: 0.19 g (16%). mp: 178-182 °C. <sup>1</sup>H NMR (400 MHz, CDCl<sub>3</sub>): δ 7.62 (s, 2H, Ar), 7.58 (s, 2H, Ar), 7.31 (s, 2H, Ar), 1.59 (t, 18H, *t*-Bu), 1.41 (s, 18H, *t*-Bu). <sup>31</sup>P{<sup>1</sup>H} NMR (161 MHz, CDCl<sub>3</sub>): δ 91.2 (s, 1P). <sup>13</sup>C{<sup>1</sup>H} NMR (150 MHz, CDCl<sub>3</sub>): δ 185.8 (d, *J*<sub>pc</sub> = 52.5 Hz), 160.8, 151.5, 151.4, 138.7, 130.9 (d, *J*<sub>pc</sub> = 48 Hz), 125.9, 117.6, 108.0, 37.0, 35.3, 31.5, 31.1. UV (CH<sub>2</sub>Cl<sub>2</sub>): λ<sub>max</sub>/nm 457 (ε/M<sup>-1</sup>·cm<sup>-1</sup> 32283). Fluorescence (CH<sub>2</sub>Cl<sub>2</sub>): λ<sub>em</sub>/nm 533. Quantum Yield (CH<sub>2</sub>Cl<sub>2</sub>): Φ 0.12. HRMS (EI, 70

ev): m/z 576.2401 (Calc. 576.2381).

### **1,3,5-Tris(4',6'-di-*tert*-butyl-benzoxaphospholy)benzene (4)**

To a solution of 3,5-di-*tert*-butyl-2-phosphinophenol (1.0 g, 4.2 mmol) in 10 mL THF was added triethylamine (0.59 mL, 4.2 mmol), followed by a solution of 1,3,5-benzenetricarbonyl trichloride (0.37 g, 1.4 mmol) in 10 mL THF. The mixture was stirred at room temperature overnight to produce a yellow cloudy solution. A white precipitate was removed by filtration and the solvent was removed under vacuum to yield a yellow solid. The solid was dissolved in 10 mL toluene, and the reaction was refluxed for 96 hours to produce a yellow cloudy solution. After the reaction was cooled to room temperature, the solvent was removed under vacuum to give a yellow solid. The solid was extracted with hexanes twice, and the combined filtrates were evaporated under vacuum to yield a yellow solid. The crude product was purified by flash column chromatography using hexanes as the eluant. The solvent was removed under vacuum to give a yellow solid. Yield: 0.21 g (18%). mp: > 320 °C. <sup>1</sup>H NMR (400 MHz, CDCl<sub>3</sub>): δ 8.65 (s, 3H, Ar), 7.78 (s, 3H, Ar), 7.37 (s, 3H, Ar), 1.65 (s, 27H, *t*-Bu), 1.45 (s, 27H, *t*-Bu). <sup>31</sup>P{<sup>1</sup>H} NMR (161 MHz, CDCl<sub>3</sub>): δ 94.9 (s, 1P). <sup>13</sup>C{<sup>1</sup>H} NMR (150 MHz, CDCl<sub>3</sub>): δ 192.0 (d, *J*<sub>pc</sub> = 54.0 Hz), 161.6 (d, *J*<sub>pc</sub> = 15.0 Hz), 151.5, 151.4, 135.9, 130.6 (d, *J*<sub>pc</sub> = 45.0 Hz), 121.0, 117.5, 108.4, 37.0, 35.3, 31.5, 31.2. UV (CH<sub>2</sub>Cl<sub>2</sub>): λ<sub>max</sub>/nm 362 (ε/M<sup>-1</sup>·cm<sup>-1</sup> 28214). Fluorescence (CH<sub>2</sub>Cl<sub>2</sub>): λ<sub>em</sub>/nm 437, 451sh. Quantum Yield (CH<sub>2</sub>Cl<sub>2</sub>): Φ 0.14. HRMS (EI, 70 ev): m/z 816.4010 (Calc. 816.3990).



### 3. X-ray crystallographic data

Single crystal X-ray details for compound **1** are accessible in the accompanying cif file (CCDC 1007938). For further details see Table S1-S5. A severely disordered solvent molecule (hexane) was located in the asymmetric unit, but modeling it proved impossible. The solvent contributions were treated using SQUEEZE which found 37 electrons corresponding to approximately one molecule of hexane; it is included in the formula and the computation of the intensive properties.

**Table S1** Crystal data and structure refinement for **1**.

|                                   |                                                                                                          |
|-----------------------------------|----------------------------------------------------------------------------------------------------------|
| Empirical formula                 | C <sub>42</sub> H <sub>58</sub> O <sub>2</sub> P <sub>2</sub>                                            |
| Formula weight                    | 656.82                                                                                                   |
| Temperature                       | 296(2) K                                                                                                 |
| Wavelength                        | 0.71073 Å                                                                                                |
| Crystal system                    | Triclinic                                                                                                |
| Space group                       | P-1                                                                                                      |
| Unit cell dimensions              | a = 6.5471(4) Å a = 100.773(2)°<br>b = 10.5862(6) Å β = 101.934 (2)°<br>c = 14.3323(9) Å γ = 107.345(2)° |
| Volume                            | 895.07 (9) Å <sup>3</sup>                                                                                |
| Z                                 | 1                                                                                                        |
| Calculated density                | 1.219 Mg/m <sup>3</sup>                                                                                  |
| Absorption coefficient            | 0.157 mm <sup>-1</sup>                                                                                   |
| F(000)                            | 356                                                                                                      |
| Crystal size                      | 0.24×0.20×0.11 mm                                                                                        |
| θ range for data collection       | 1.51 to 26.49°                                                                                           |
| Limiting indices                  | -8 ≤ h ≤ 8, -11 ≤ k ≤ 13,<br>-17 ≤ l ≤ 17                                                                |
| Reflections collected             | 11737                                                                                                    |
| Completeness to θ = 26.49°        | 98.7 %                                                                                                   |
| Absorption correction             | Multi-Scan                                                                                               |
| Max. and min. transmission        | 0.9829 and 0.9633                                                                                        |
| Refinement method                 | Full-matrix least-squares on F <sup>2</sup>                                                              |
| Data/restraints/parameters        | 3677/0/187                                                                                               |
| Goodness-of-fit on F <sup>2</sup> | 1.002                                                                                                    |
| Final R indices [I > 2σ(I)]       | R1=0.0352, wR2=0.1204                                                                                    |
| R indices (all data)              | R1=0.0419, wR2=0.1273                                                                                    |
| Largest diff. peak and hole       | 0.347 and -0.175 e.Å <sup>-3</sup>                                                                       |

**Table S2** Atomic coordinates ( $\times 10^4$ ) and equivalent isotropic displacement parameters ( $\text{\AA}^2 \times 10^3$ ) for **1**.

|       | x        | y        | z       | U(eq) |
|-------|----------|----------|---------|-------|
| P(1)  | 6622(1)  | 1916(1)  | 1593(1) | 14(1) |
| O(1)  | 6088(2)  | -663(1)  | 1499(1) | 14(1) |
| C(1)  | 1405(2)  | -3278(1) | 3398(1) | 22(1) |
| C(2)  | 1126(2)  | -1875(1) | 3620(1) | 15(1) |
| C(3)  | 2477(2)  | -889(1)  | 3122(1) | 14(1) |
| C(4)  | 3685(2)  | -1288(1) | 2513(1) | 14(1) |
| C(5)  | 4859(2)  | -314(1)  | 2109(1) | 13(1) |
| C(6)  | 7105(2)  | 438(1)   | 1179(1) | 14(1) |
| C(7)  | 8548(2)  | 194(1)   | 564(1)  | 14(1) |
| C(8)  | 9326(2)  | -900(1)  | 561(1)  | 16(1) |
| C(9)  | 9237(2)  | 1083(1)  | -3(1)   | 16(1) |
| C(10) | 1919(2)  | -1260(2) | 4745(1) | 20(1) |
| C(11) | 2513(2)  | 478(1)   | 3299(1) | 14(1) |
| C(12) | 3716(2)  | 1459(1)  | 2916(1) | 12(1) |
| C(13) | 4921(2)  | 1035(1)  | 2271(1) | 13(1) |
| C(14) | 3873(2)  | 2963(1)  | 3214(1) | 14(1) |
| C(15) | 3138(2)  | 3459(1)  | 2300(1) | 18(1) |
| C(16) | 2404(2)  | 3179(2)  | 3892(1) | 20(1) |
| C(17) | 6311(2)  | 3856(1)  | 3780(1) | 20(1) |
| C(18) | -1358(2) | -2081(2) | 3242(1) | 21(1) |

U(eq) is defined as one third of the trace of the orthogonalized  $U^{ij}$  tensor.



**Table S3** Bond lengths [Å] and angles [°] for **1**.

|                  |            |                   |            |
|------------------|------------|-------------------|------------|
| P(1)-C(6)        | 1.7117(14) | C(9)-H(5)         | 0.9300     |
| P(1)-C(13)       | 1.7951(13) | C(10)-H(2)        | 0.9600     |
| O(1)-C(6)        | 1.3701(16) | C(10)-H(17)       | 0.9600     |
| O(1)-C(5)        | 1.3769(15) | C(10)-H(18)       | 0.9600     |
| C(1)-C(2)        | 1.5334(19) | C(11)-C(12)       | 1.3812(18) |
| C(1)-H(15)       | 0.9600     | C(11)-H(22)       | 0.9300     |
| C(1)-H(1)        | 0.9600     | C(12)-C(13)       | 1.4268(17) |
| C(1)-H(16)       | 0.9600     | C(12)-C(14)       | 1.5366(18) |
| C(2)-C(10)       | 1.5344(19) | C(14)-C(16)       | 1.5358(18) |
| C(2)-C(18)       | 1.5381(18) | C(14)-C(15)       | 1.5387(19) |
| C(2)-C(3)        | 1.5404(17) | C(14)-C(17)       | 1.5424(19) |
| C(3)-C(4)        | 1.3825(17) | C(15)-H(8)        | 0.9600     |
| C(3)-C(11)       | 1.4157(18) | C(15)-H(7)        | 0.9600     |
| C(4)-C(5)        | 1.3880(18) | C(15)-H(6)        | 0.9600     |
| C(4)-H(3)        | 0.9300     | C(16)-H(9)        | 0.9600     |
| C(5)-C(13)       | 1.3917(19) | C(16)-H(10)       | 0.9600     |
| C(6)-C(7)        | 1.4625(17) | C(16)-H(11)       | 0.9600     |
| C(7)-C(9)        | 1.3917(19) | C(17)-H(14)       | 0.9600     |
| C(7)-C(8)        | 1.3978(19) | C(17)-H(12)       | 0.9600     |
| C(8)-C(9)#1      | 1.3868(18) | C(17)-H(13)       | 0.9600     |
| C(8)-H(4)        | 0.9300     | C(18)-H(20)       | 0.9600     |
| C(9)-C(8)#1      | 1.3868(18) | C(18)-H(21)       | 0.9600     |
| C(18)-H(19)      | 0.9600     | C(5)-C(4)-H(3)    | 121.2      |
| C(1)-C(2)-C(10)  | 108.16(11) | O(1)-C(5)-C(4)    | 119.63(12) |
| C(1)-C(2)-C(18)  | 108.77(11) | O(1)-C(5)-C(13)   | 115.32(11) |
| C(10)-C(2)-C(18) | 109.25(11) | C(4)-C(5)-C(13)   | 125.05(12) |
| C(1)-C(2)-C(3)   | 111.86(11) | O(1)-C(6)-C(7)    | 114.63(11) |
| C(10)-C(2)-C(3)  | 109.53(10) | O(1)-C(6)-P(1)    | 116.22(9)  |
| C(18)-C(2)-C(3)  | 109.23(10) | C(7)-C(6)-P(1)    | 129.08(10) |
| C(4)-C(3)-C(11)  | 118.52(12) | C(9)-C(7)-C(8)    | 118.68(12) |
| C(4)-C(3)-C(2)   | 122.25(12) | C(9)-C(7)-C(6)    | 120.27(12) |
| C(11)-C(3)-C(2)  | 119.22(11) | C(8)-C(7)-C(6)    | 121.01(12) |
| C(3)-C(4)-C(5)   | 117.54(12) | C(9)#1-C(8)-C(7)  | 120.16(12) |
| C(3)-C(4)-H(3)   | 121.2      | C(6)-P(1)-C(13)   | 88.50(6)   |
| C(9)#1-C(8)-H(4) | 119.9      | C(12)-C(11)-H(22) | 117.9      |

|                   |            |                   |            |
|-------------------|------------|-------------------|------------|
| C(7)-C(8)-H(4)    | 119.9      | C(3)-C(11)-H(22)  | 117.9      |
| C(8)#1-C(9)-C(7)  | 121.16(13) | C(11)-C(12)-C(13) | 117.05(12) |
| C(8)#1-C(9)-H(5)  | 119.4      | C(11)-C(12)-C(14) | 121.85(11) |
| C(7)-C(9)-H(5)    | 119.4      | C(13)-C(12)-C(14) | 121.00(11) |
| C(2)-C(10)-H(2)   | 109.5      | C(5)-C(13)-C(12)  | 117.60(12) |
| C(2)-C(10)-H(17)  | 109.5      | C(5)-C(13)-P(1)   | 109.66(9)  |
| H(2)-C(10)-H(17)  | 109.5      | C(12)-C(13)-P(1)  | 132.73(10) |
| C(2)-C(10)-H(18)  | 109.5      | C(16)-C(14)-C(12) | 112.09(11) |
| H(2)-C(10)-H(18)  | 109.5      | C(16)-C(14)-C(15) | 107.46(11) |
| H(17)-C(10)-H(18) | 109.5      | C(12)-C(14)-C(15) | 111.32(11) |
| C(12)-C(11)-C(3)  | 124.19(12) | C(16)-C(14)-C(17) | 108.01(11) |
| C(12)-C(14)-C(17) | 108.60(10) | C(14)-C(16)-H(11) | 109.5      |
| C(15)-C(14)-C(17) | 109.27(11) | H(9)-C(16)-H(11)  | 109.5      |
| C(14)-C(15)-H(8)  | 109.5      | H(10)-C(16)-H(11) | 109.5      |
| C(14)-C(15)-H(7)  | 109.5      | C(14)-C(17)-H(14) | 109.5      |
| H(8)-C(15)-H(7)   | 109.5      | C(14)-C(17)-H(12) | 109.5      |
| C(14)-C(15)-H(6)  | 109.5      | H(14)-C(17)-H(12) | 109.5      |
| H(8)-C(15)-H(6)   | 109.5      | C(14)-C(17)-H(13) | 109.5      |
| H(7)-C(15)-H(6)   | 109.5      | H(14)-C(17)-H(13) | 109.5      |
| C(14)-C(16)-H(9)  | 109.5      | H(12)-C(17)-H(13) | 109.5      |
| C(14)-C(16)-H(10) | 109.5      | C(2)-C(18)-H(20)  | 109.5      |
| C(2)-C(18)-H(21)  | 109.5      | C(2)-C(18)-H(19)  | 109.5      |
| H(20)-C(18)-H(21) | 109.5      | H(20)-C(18)-H(19) | 109.5      |
| H(21)-C(18)-H(19) | 109.5      | C(2)-C(18)-H(21)  | 109.5      |
| C(6)-O(1)-C(5)    | 110.30(10) | H(9)-C(16)-H(10)  | 109.5      |
| C(2)-C(1)-H(15)   | 109.5      | C(2)-C(1)-H(1)    | 109.5      |
| C(2)-C(1)-H(1)    | 109.5      | H(15)-C(1)-H(16)  | 109.5      |
| H(15)-C(1)-H(1)   | 109.5      | H(1)-C(1)-H(16)   | 109.5      |

Symmetry transformations used to generate equivalent atoms: #1 -x+2,-y,-z

**Table S4** Anisotropic displacement parameters ( $\text{\AA}^2 \times 10^3$ ) for **1**.

|       | U <sup>11</sup> | U <sup>22</sup> | U <sup>33</sup> | U <sup>23</sup> | U <sup>13</sup> | U <sup>12</sup> |
|-------|-----------------|-----------------|-----------------|-----------------|-----------------|-----------------|
| P(1)  | 17(1)           | 13(1)           | 17(1)           | 6(1)            | 11(1)           | 6(1)            |
| O(1)  | 16(1)           | 13(1)           | 18(1)           | 5(1)            | 12(1)           | 6(1)            |
| C(1)  | 26(1)           | 16(1)           | 30(1)           | 12(1)           | 16(1)           | 8(1)            |
| C(2)  | 15(1)           | 16(1)           | 19(1)           | 8(1)            | 10(1)           | 6(1)            |
| C(3)  | 12(1)           | 15(1)           | 14(1)           | 5(1)            | 4(1)            | 4(1)            |
| C(4)  | 15(1)           | 11(1)           | 16(1)           | 4(1)            | 7(1)            | 5(1)            |
| C(5)  | 12(1)           | 16(1)           | 12(1)           | 3(1)            | 6(1)            | 6(1)            |
| C(6)  | 13(1)           | 16(1)           | 13(1)           | 6(1)            | 6(1)            | 4(1)            |
| C(7)  | 12(1)           | 16(1)           | 12(1)           | 1(1)            | 5(1)            | 4(1)            |
| C(8)  | 19(1)           | 17(1)           | 15(1)           | 8(1)            | 10(1)           | 7(1)            |
| C(9)  | 19(1)           | 18(1)           | 17(1)           | 7(1)            | 9(1)            | 10(1)           |
| C(10) | 23(1)           | 21(1)           | 19(1)           | 10(1)           | 11(1)           | 7(1)            |
| C(11) | 14(1)           | 17(1)           | 13(1)           | 3(1)            | 7(1)            | 7(1)            |
| C(12) | 13(1)           | 14(1)           | 12(1)           | 3(1)            | 4(1)            | 5(1)            |
| C(13) | 12(1)           | 15(1)           | 13(1)           | 4(1)            | 5(1)            | 4(1)            |
| C(14) | 19(1)           | 12(1)           | 16(1)           | 4(1)            | 9(1)            | 6(1)            |
| C(15) | 22(1)           | 17(1)           | 21(1)           | 7(1)            | 10(1)           | 10(1)           |
| C(16) | 30(1)           | 15(1)           | 22(1)           | 6(1)            | 16(1)           | 11(1)           |
| C(17) | 23(1)           | 14(1)           | 22(1)           | 2(1)            | 6(1)            | 5(1)            |
| C(18) | 16(1)           | 24(1)           | 27(1)           | 13(1)           | 9(1)            | 5(1)            |

The anisotropic displacement factor exponent takes the form:  $-2\pi^2 [h^2 a^{*2} U^{11} + \dots + 2 h k a^* b^* U^{12}]$

**Table S5** Hydrogen coordinates ( $\times 10^4$ ) and isotropic displacement parameters ( $\text{\AA}^2 \times 10^{-3}$ ) for **1**.

|       | x     | y     | z    | U(eq) |
|-------|-------|-------|------|-------|
| H(15) | 2955  | -3158 | 3614 | 32    |
| H(1)  | 843   | -3702 | 2699 | 32    |
| H(16) | 590   | -3850 | 3741 | 32    |
| H(3)  | 3710  | -2175 | 2380 | 16    |
| H(4)  | 8878  | -1506 | 934  | 19    |
| H(5)  | 8725  | 1812  | -9   | 19    |
| H(2)  | 1782  | -373  | 4899 | 30    |
| H(17) | 3450  | -1171 | 4987 | 30    |
| H(18) | 1021  | -1851 | 5052 | 30    |
| H(22) | 1672  | 732   | 3699 | 17    |
| H(8)  | 3304  | 4408  | 2507 | 27    |
| H(7)  | 1605  | 2926  | 1959 | 27    |
| H(6)  | 4047  | 3353  | 1866 | 27    |
| H(9)  | 2531  | 4126  | 4052 | 30    |
| H(10) | 2882  | 2931  | 4489 | 30    |
| H(11) | 879   | 2616  | 3559 | 30    |
| H(14) | 6433  | 4800  | 3970 | 31    |
| H(12) | 7257  | 3758  | 3362 | 31    |
| H(13) | 6760  | 3567  | 4361 | 31    |
| H(20) | -1554 | -1210 | 3383 | 32    |
| H(21) | -2201 | -2673 | 3566 | 32    |
| H(19) | -1871 | -2490 | 2540 | 32    |

#### 4. NMR spectra

$^{31}\text{P}\{^1\text{H}\}$  NMR spectrum of 1,4-bis(4',6'-di-*tert*-butylbenzoxaphospholy)benzene (**1**)

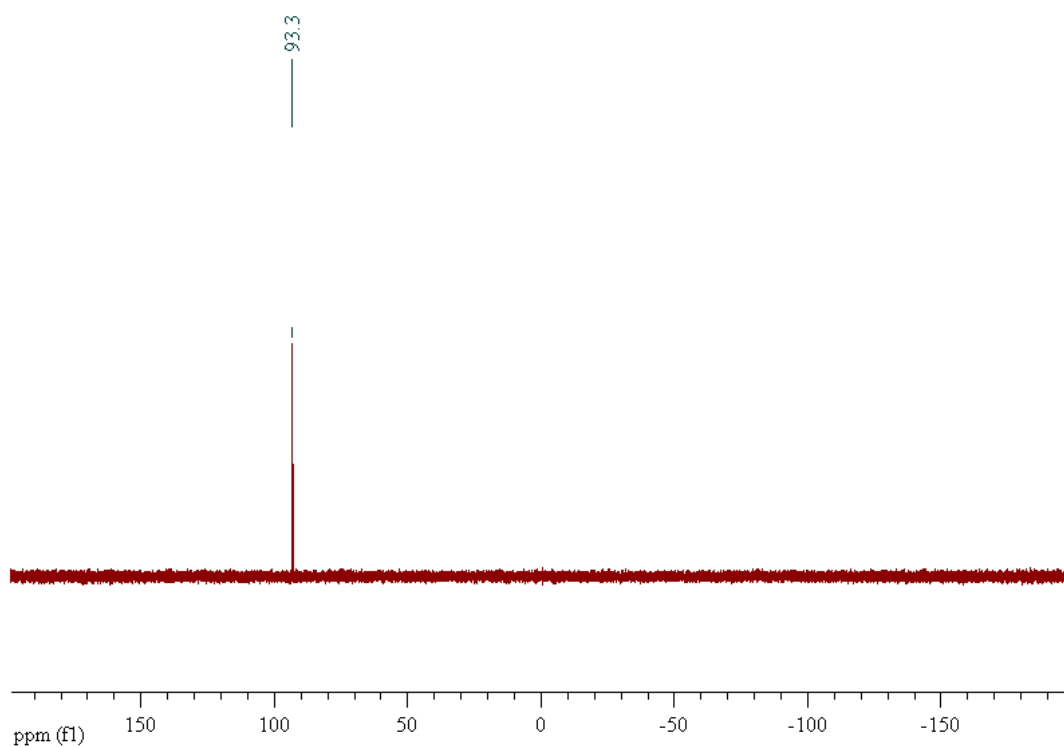

$^1\text{H}$  NMR spectrum of 1,4-bis(4',6'-di-*tert*-butylbenzoxaphospholy)benzene (**1**)

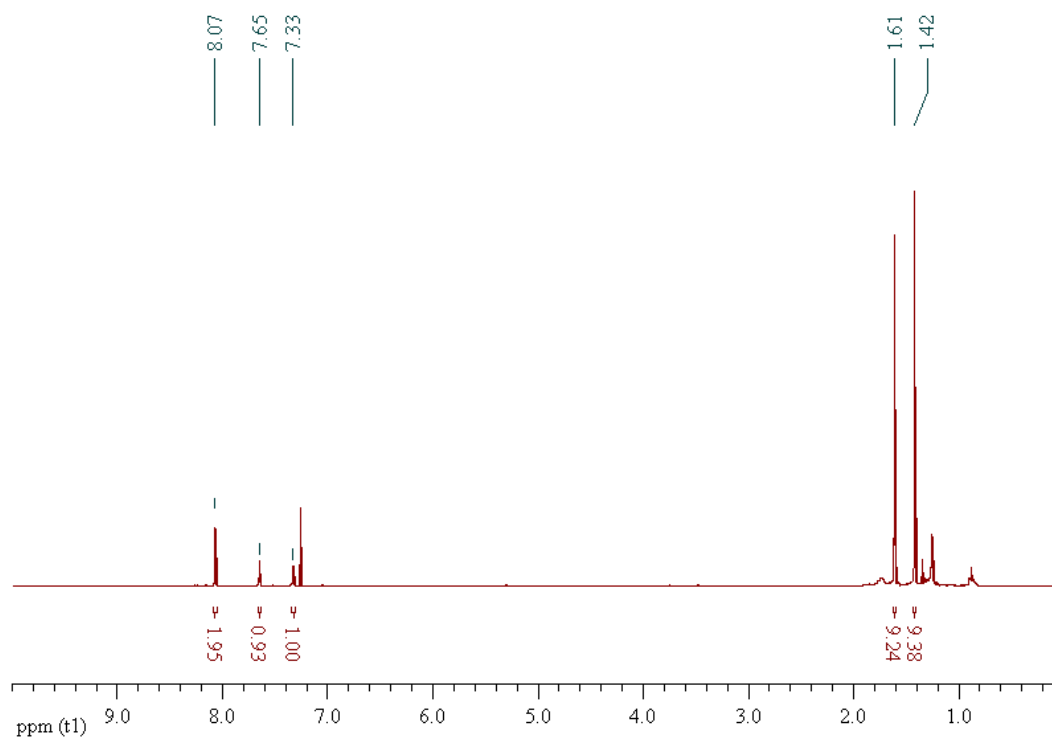

$^{13}\text{C}\{^1\text{H}\}$  NMR spectrum of 1,4-bis(4',6'-di-*tert*-butylbenzoxaphospholyl)benzene (**1**)

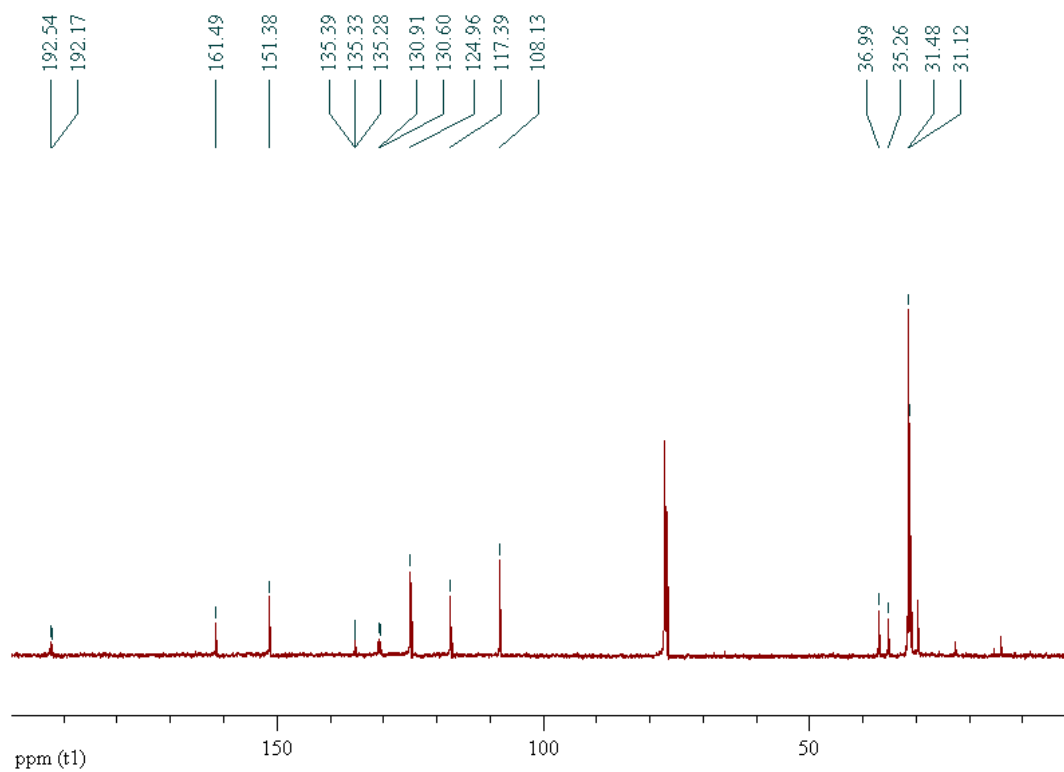

$^{31}\text{P}\{^1\text{H}\}$  NMR spectrum of 2,6-bis(4',6'-di-*tert*-butylbenzoxaphospholyl)naphthalene (**2**)

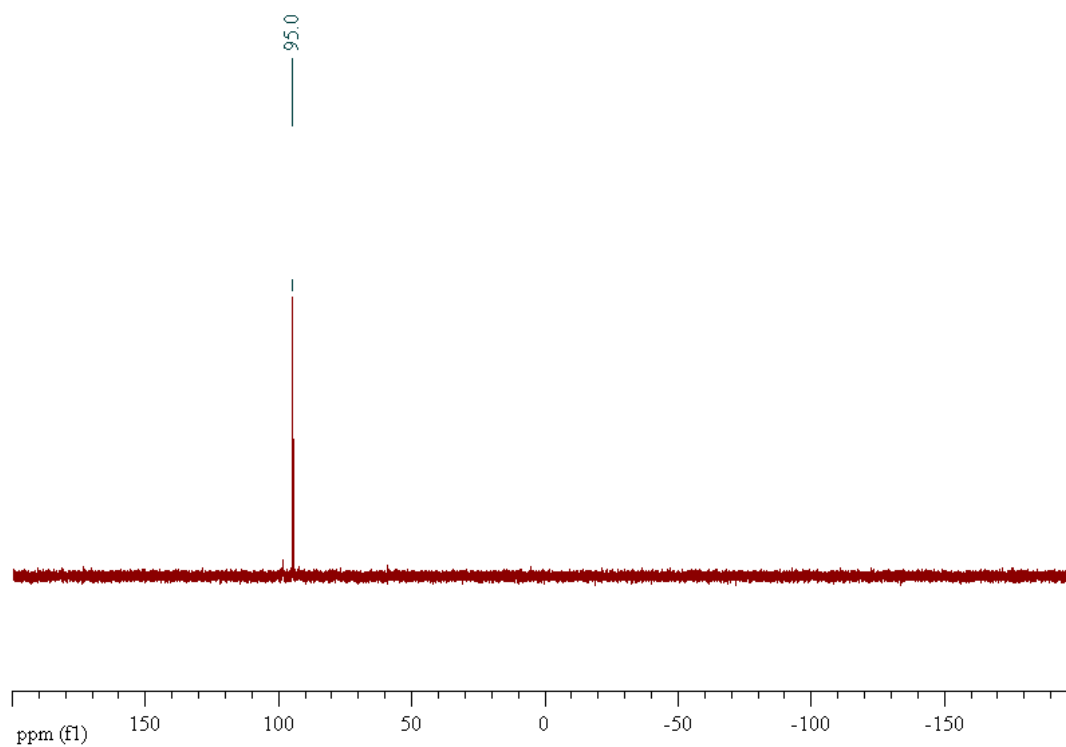

$^1\text{H}$  NMR spectrum of 2,6-bis(4',6'-di-*tert*-butylbenzoxaphospholy)naphthalene(2)

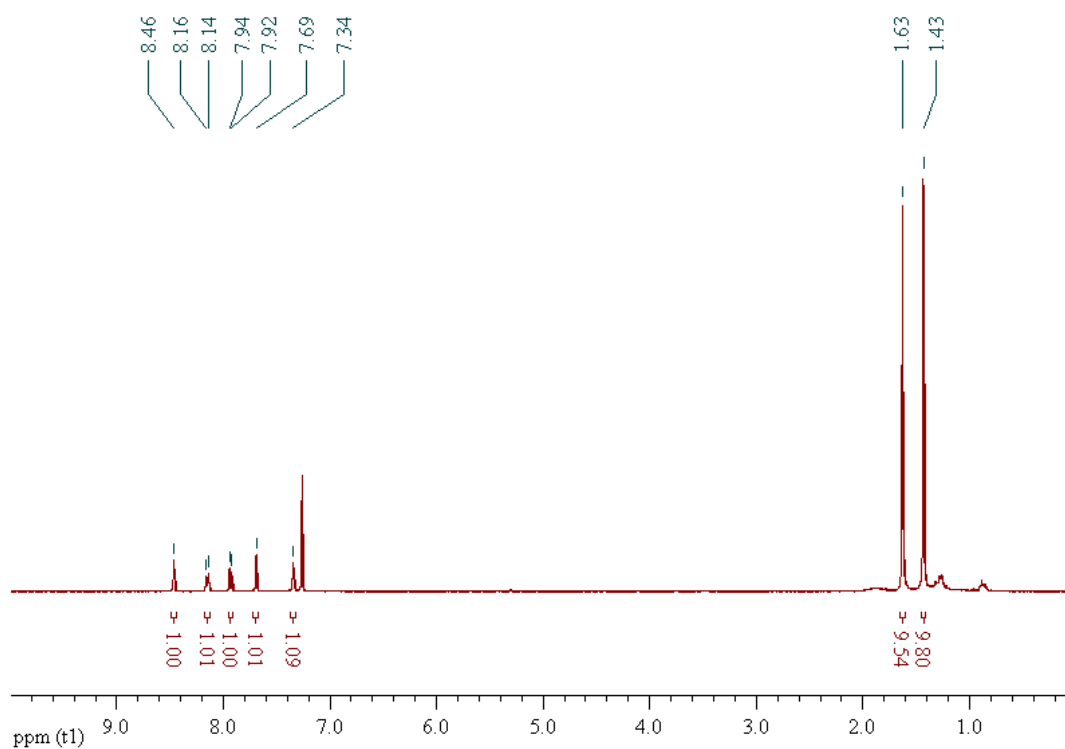

$^{13}\text{C}\{^1\text{H}\}$  NMR spectrum of 2,6-bis(4',6'-di-*tert*-butylbenzoxaphospholy)naphthalene(2)

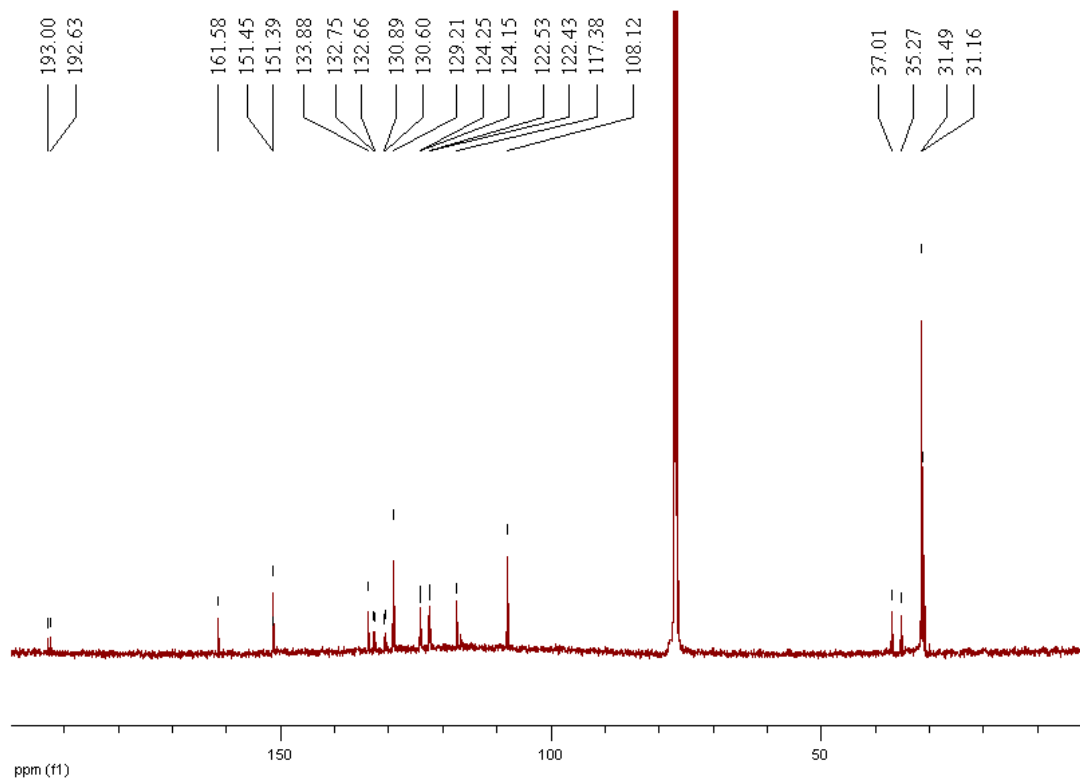

$^{31}\text{P}\{^1\text{H}\}$  NMR spectrum of 2,5-bis(4',6'-di-*tert*-butylbenzoxaphospholyl)thiophene (**3**)

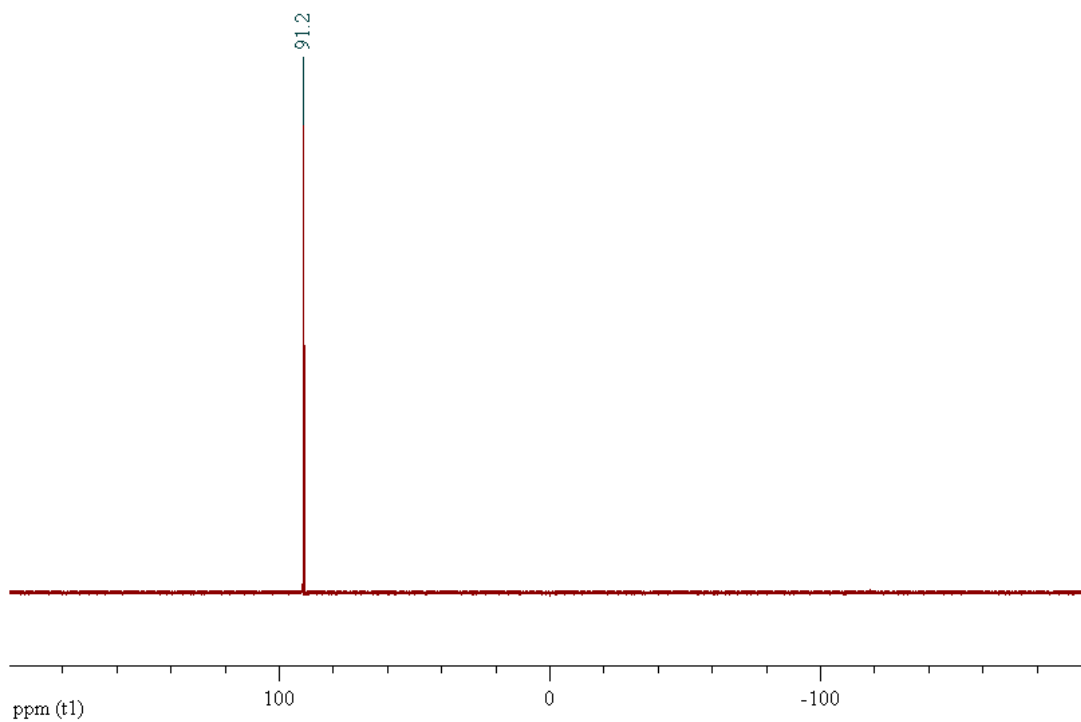

$^1\text{H}$  NMR spectrum of 2,5-bis(4',6'-di-*tert*-butylbenzoxaphospholyl)thiophene (**3**)

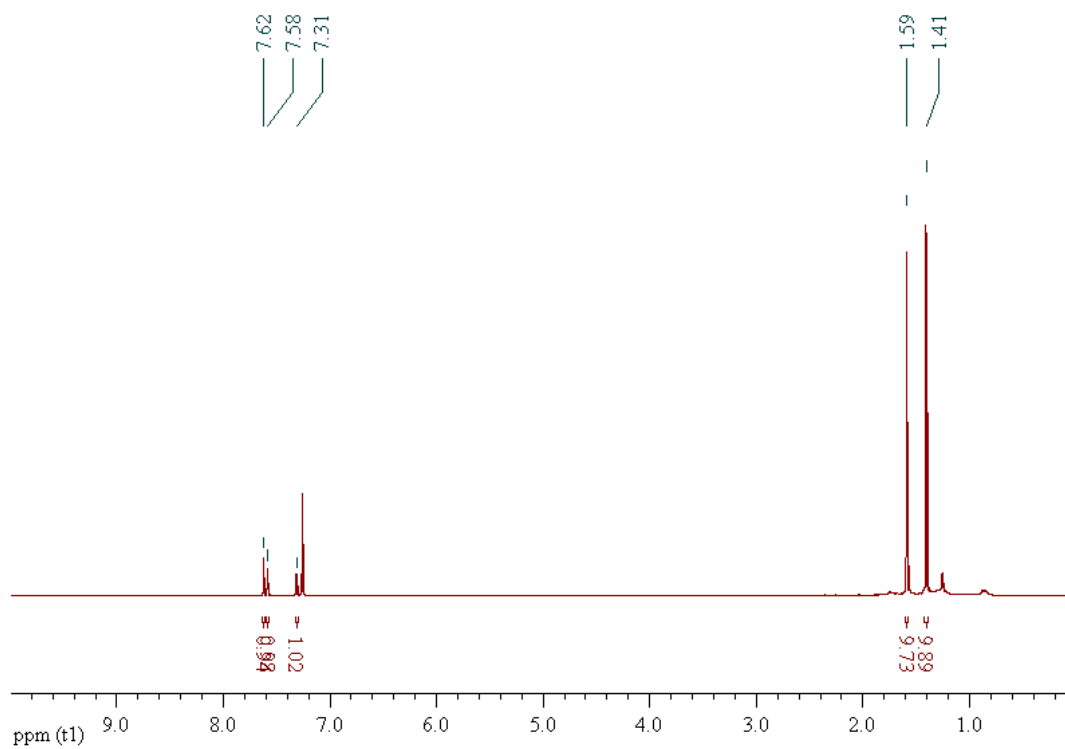



$^{13}\text{C}\{^1\text{H}\}$  NMR spectrum of 2,5-bis(4',6'-di-*tert*-butylbenzoxaphospholyl)thiophene (3)

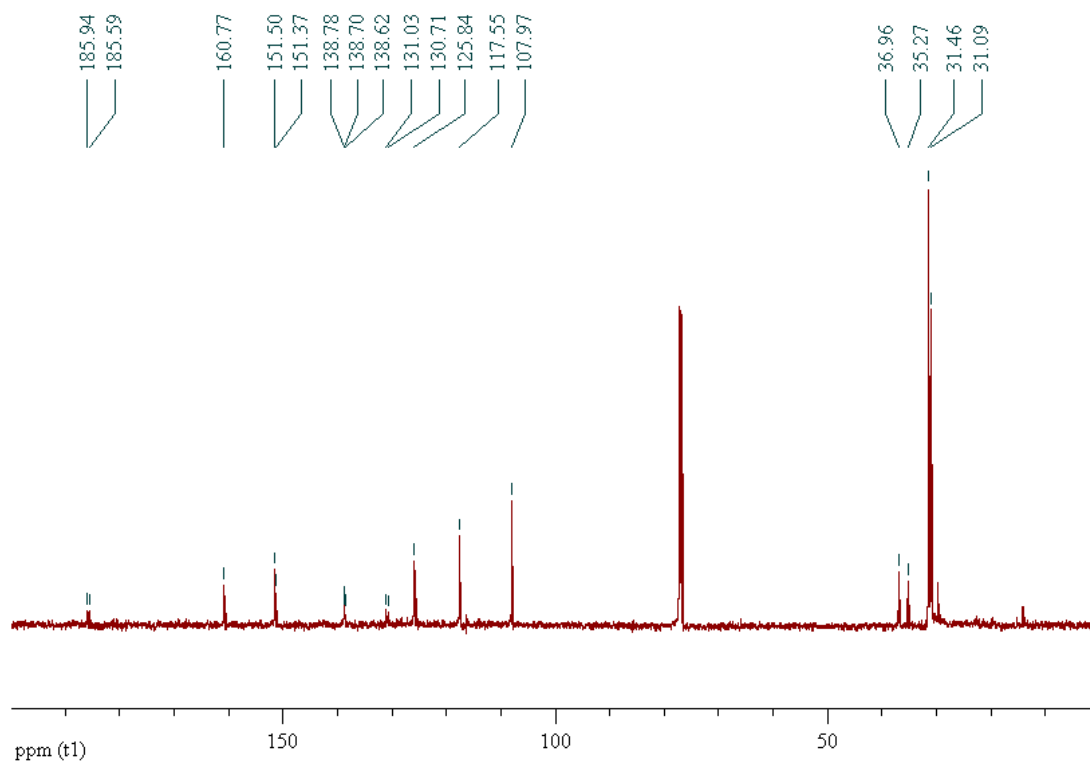

$^{31}\text{P}\{^1\text{H}\}$  NMR spectrum of 1,3,5-tris(4',6'-di-*tert*-butyl-benzoxaphospholyl)benzene (4)

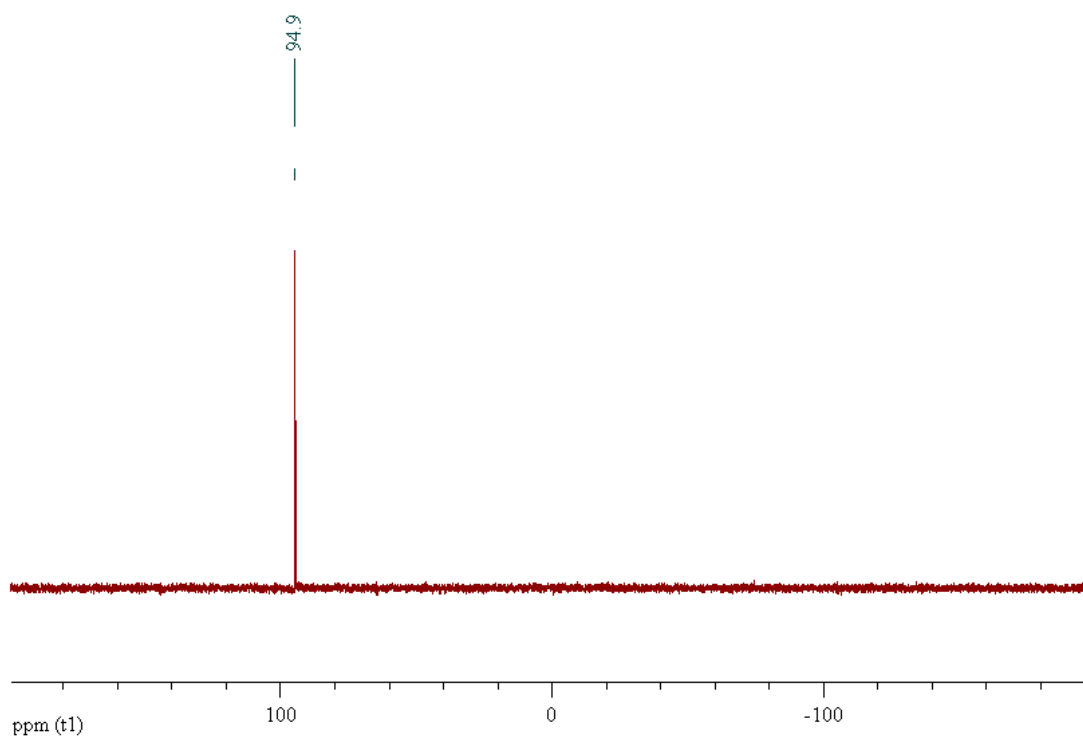

$^1\text{H}$  NMR spectrum of 1,3,5-tris(4',6'-di-*tert*-butyl-benzoxaphospholyl)benzene (**4**)

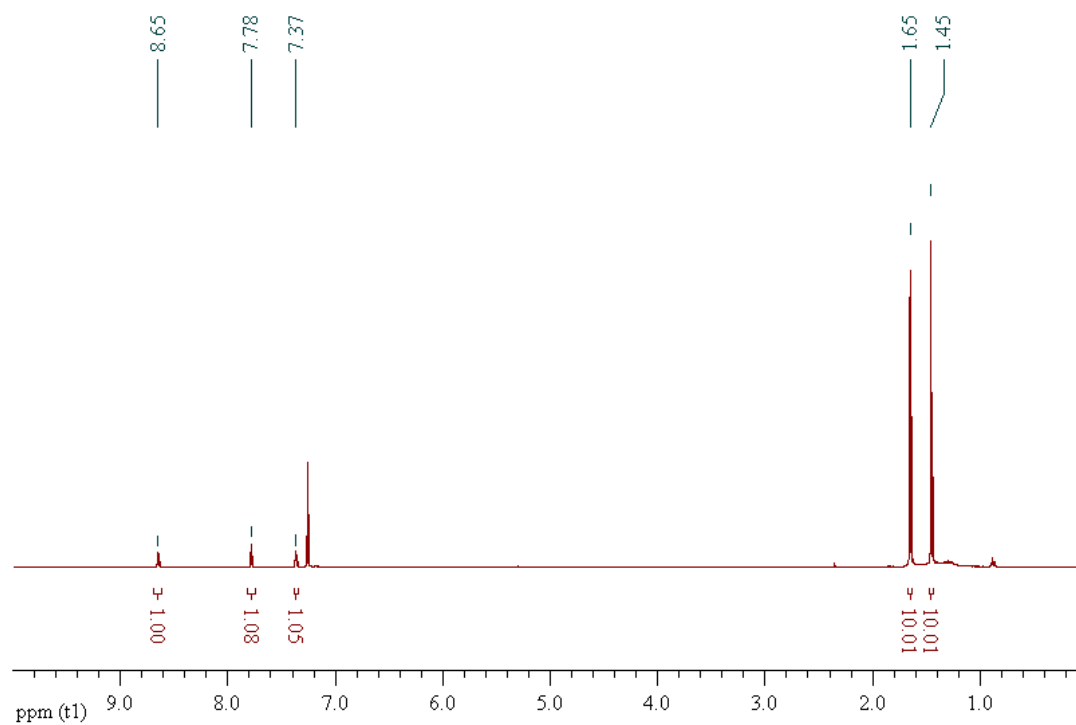

$^{13}\text{C}\{^1\text{H}\}$  NMR spectrum of 1,3,5-tris(4',6'-di-*tert*-butyl-benzoxaphospholyl)benzene (**4**)

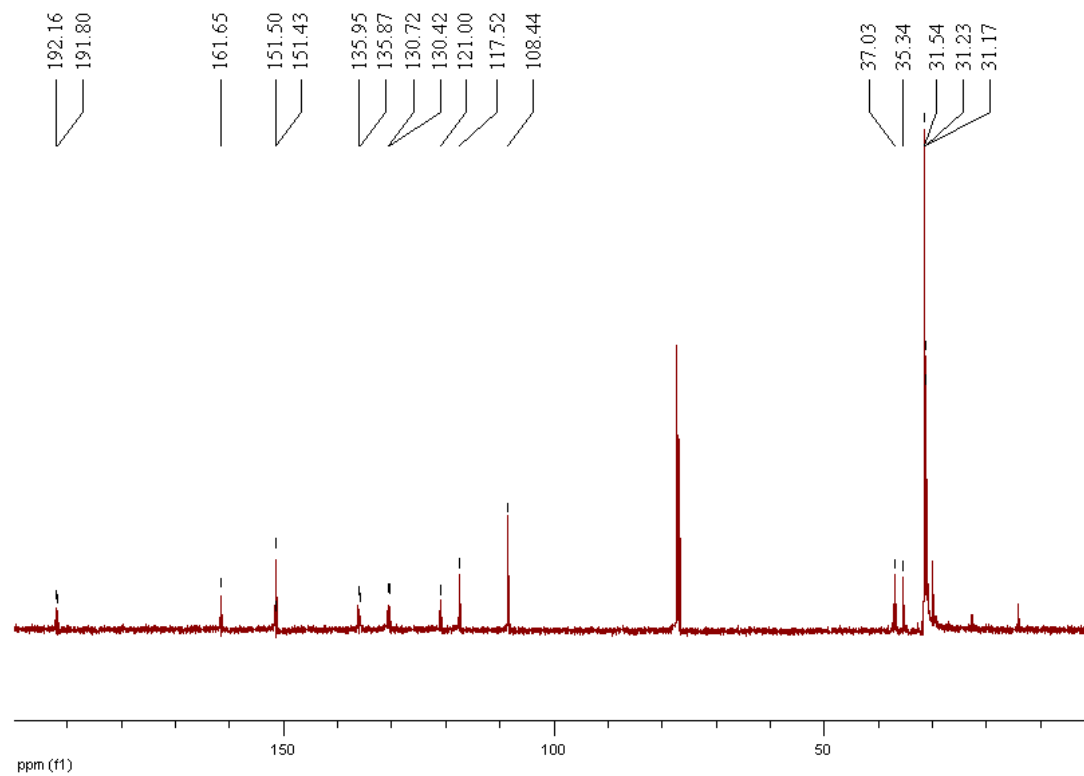

## 5. UV-vis absorption and emission spectra

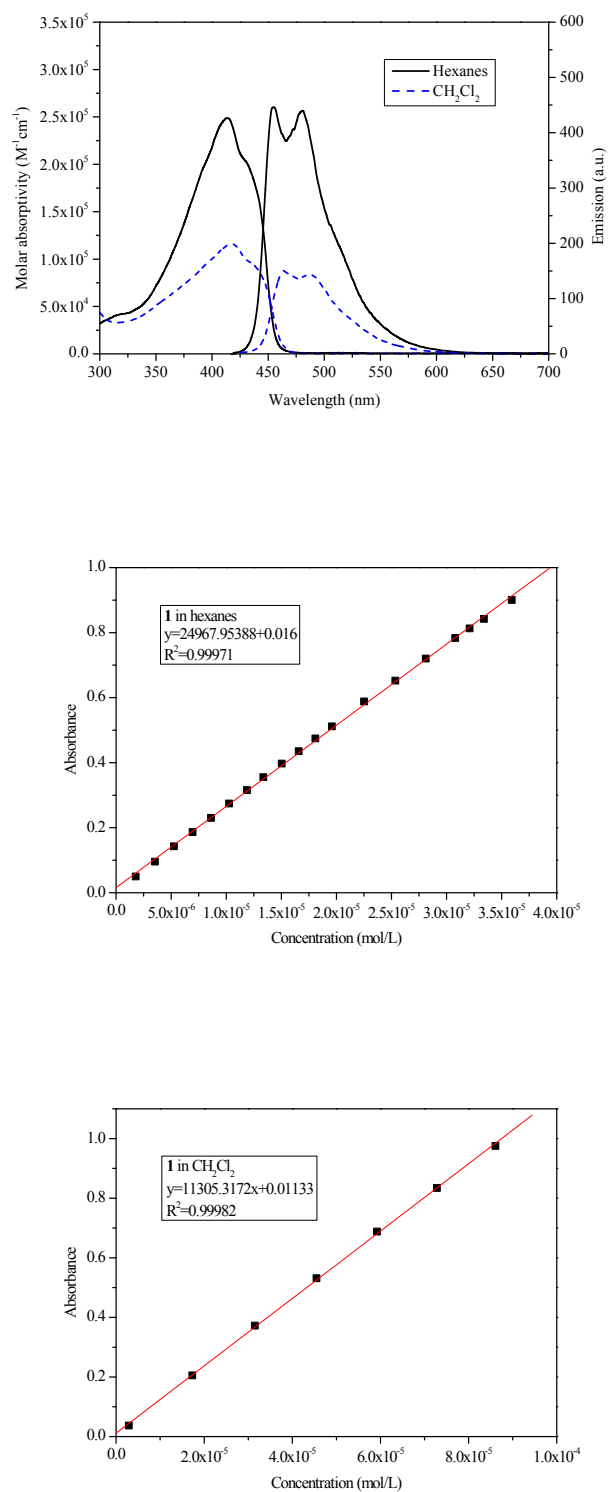

**Figure S1** UV-vis absorption and fluorescence of **1** in hexanes and  $\text{CH}_2\text{Cl}_2$  (Conc.  $0.5 \times 10^{-6}$  M, top). Excitation wavelength for fluorescence measurements was the adsorption maxima. Beer's

law plots of **1** in hexanes ( $\lambda = 413$  nm, middle) and  $\text{CH}_2\text{Cl}_2$  ( $\lambda = 418$  nm, bottom).

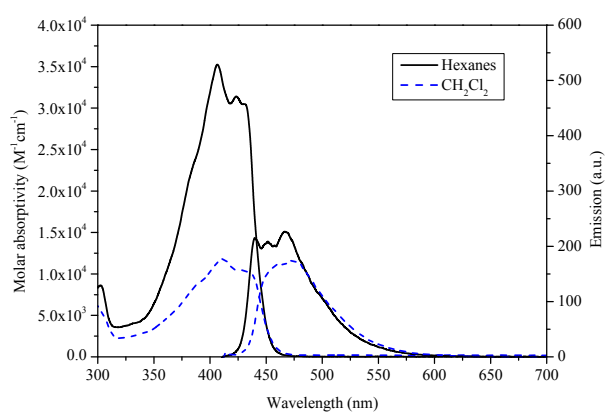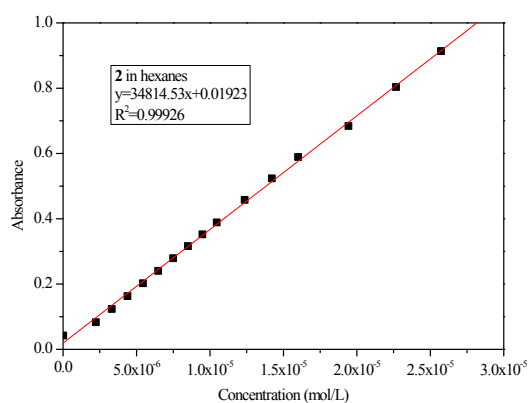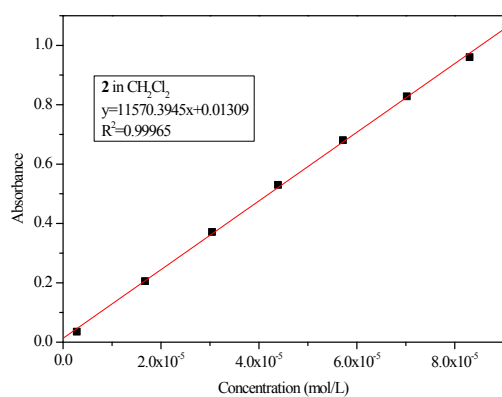

**Figure S2** UV-vis absorption and fluorescence of **2** in hexanes and  $\text{CH}_2\text{Cl}_2$  (Conc.  $0.5 \times 10^{-6}$  M, top). Excitation wavelength for fluorescence measurements was the adsorption maxima. Beer's law plots of **2** in hexanes ( $\lambda = 407$  nm, middle) and  $\text{CH}_2\text{Cl}_2$  ( $\lambda = 412$  nm, bottom).

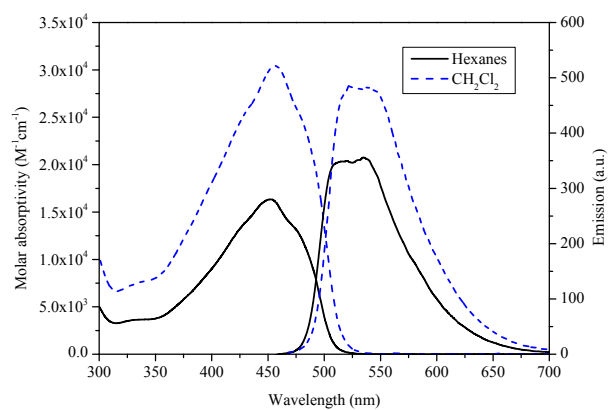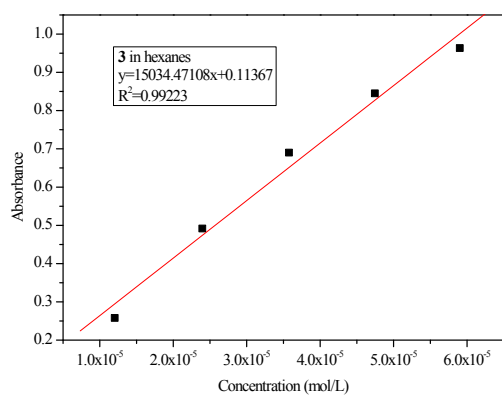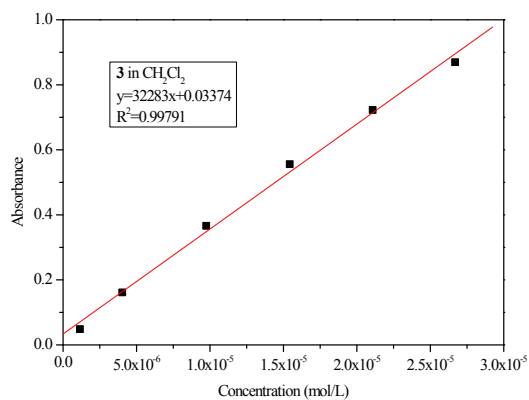

**Figure S3** UV-vis absorption and fluorescence of **3** in hexanes and CH<sub>2</sub>Cl<sub>2</sub> (Conc.  $0.5 \times 10^{-6}$  M, top). Excitation wavelength for fluorescence measurements was the adsorption maxima. Beer's law plots of **3** in hexanes ( $\lambda = 452$  nm, middle) and CH<sub>2</sub>Cl<sub>2</sub> ( $\lambda = 457$  nm, bottom).

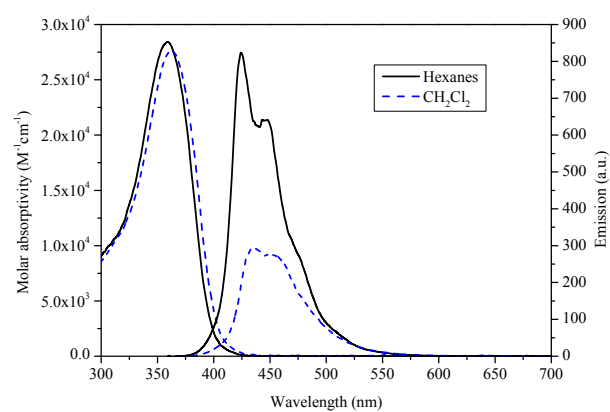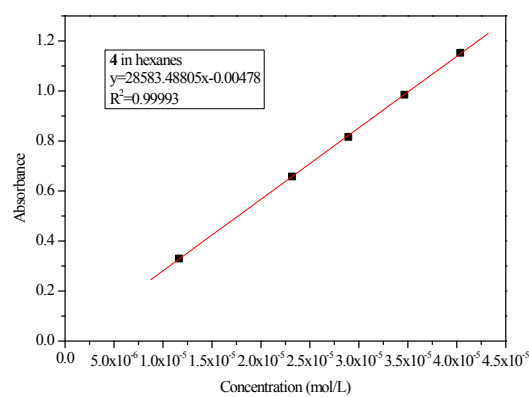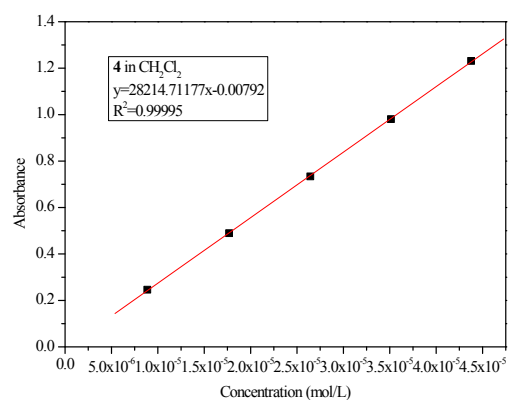

**Figure S4** UV-vis absorption and fluorescence of **4** in hexanes and  $\text{CH}_2\text{Cl}_2$  (Conc.  $2.5 \times 10^{-6}$  M, top). Excitation wavelength for fluorescence measurements was the adsorption maxima. Beer's law plots of **4** in hexanes ( $\lambda = 359$  nm, middle) and  $\text{CH}_2\text{Cl}_2$  ( $\lambda = 362$  nm, bottom).

## 6. DFT calculation

A. A series of DFT calculations (B3LYP 6-31G\*) were conducted using Spartan '10 (Wavefunction, Inc., Irvine, CA) to minimize several possible conformations of the compounds.

i. For the compound **1**, two structures were minimized. The energy difference was only 0.00021 au (ca 0.1 kcal/mol), favoring the "trans" species.

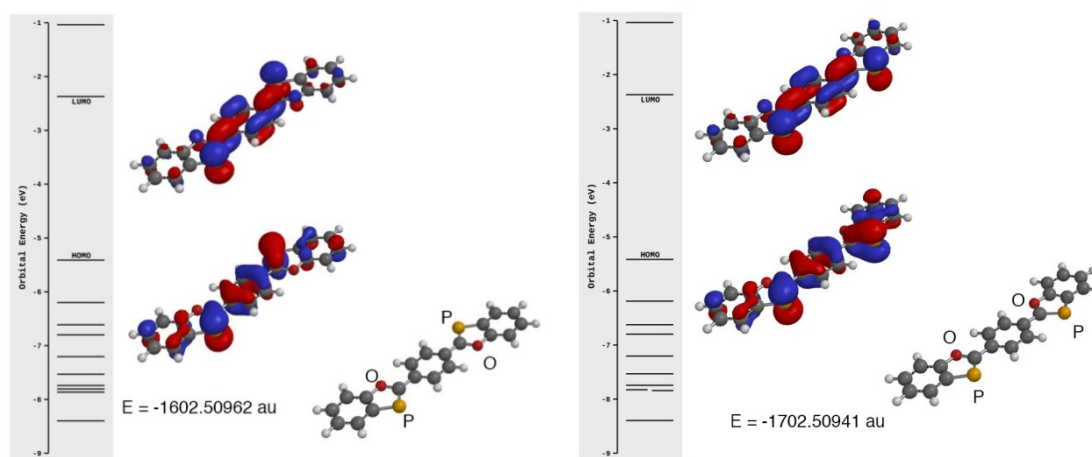

Figure S5 MO diagram for "trans" (left) and "cis" (right) isomers of **1** ( $d_{P-C} = 1.737\text{\AA}$ ).

ii. For the compound **3**, three possible structures were minimized. The lowest energy was the "cis" species having the oxygen atoms nearest to the sulfur atom.

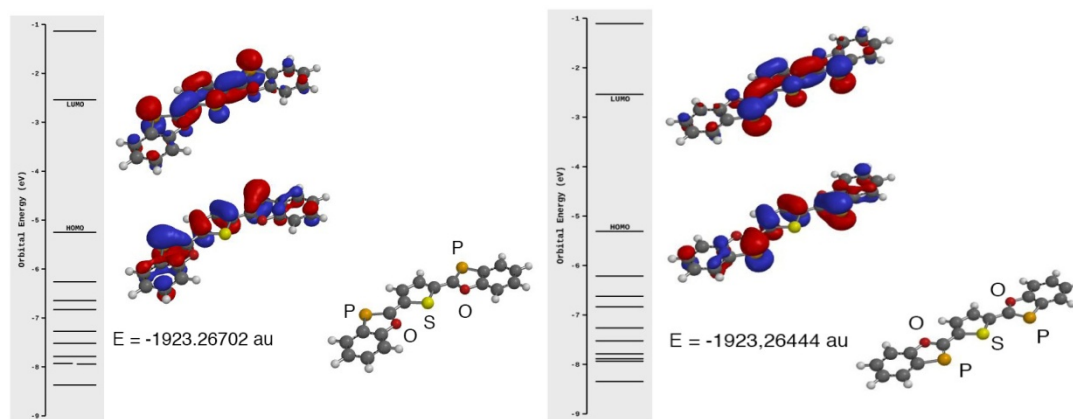

Figure S6 MO diagrams for "cis OSO" (left,  $d_{P-C} = 1.741\text{\AA}$ ) and "trans PSP" (right,  $d_{P-C} = 1.738\text{\AA}$ ) isomers of **3**.

**B.** The two lowest energy structures from the 6-31G\* calculations (Spartan '10, Wavefunction, Inc., Irvine, CA) were then subjected to further refinement using DFT B3LYP 6-311+(d,p) Gaussian 09, Revision **D.01**.<sup>4</sup> Following these optimizations, single point energy calculations were undertaken TDDFT CAM-B3LYP 6-311G+(d,p) using IEFPCM solvent correction (CH<sub>2</sub>Cl<sub>2</sub>).

**i. “trans” isomer of 1**

| Center<br>Number | Atomic<br>Number | Atomic<br>Type | Coordinates (Angstroms) |           |           |
|------------------|------------------|----------------|-------------------------|-----------|-----------|
|                  |                  |                | X                       | Y         | Z         |
| 1                | 1                | 0              | 6.953335                | -2.109129 | -0.069879 |
| 2                | 6                | 0              | 6.638577                | -1.072031 | -0.042869 |
| 3                | 6                | 0              | 5.840941                | 1.642912  | 0.027571  |
| 4                | 6                | 0              | 5.271047                | -0.747303 | -0.032996 |
| 5                | 6                | 0              | 7.581021                | -0.054411 | -0.017779 |
| 6                | 6                | 0              | 7.185305                | 1.293862  | 0.017036  |
| 7                | 6                | 0              | 4.912281                | 0.607024  | 0.002366  |
| 8                | 1                | 0              | 8.636773                | -0.299591 | -0.025235 |
| 9                | 1                | 0              | 7.938209                | 2.073064  | 0.036011  |
| 10               | 1                | 0              | 5.516108                | 2.675701  | 0.054380  |
| 11               | 15               | 0              | 3.798510                | -1.781492 | -0.056789 |
| 12               | 6                | 0              | 2.852501                | -0.330334 | -0.018154 |
| 13               | 8                | 0              | 3.566947                | 0.834796  | 0.010646  |
| 14               | 6                | 0              | 1.407726                | -0.158931 | -0.009542 |
| 15               | 6                | 0              | -1.407726               | 0.158931  | 0.009542  |
| 16               | 6                | 0              | 0.551397                | -1.274103 | -0.053247 |
| 17               | 6                | 0              | 0.823410                | 1.121861  | 0.043583  |
| 18               | 6                | 0              | -0.551397               | 1.274103  | 0.053247  |
| 19               | 6                | 0              | -0.823410               | -1.121861 | -0.043583 |
| 20               | 1                | 0              | 0.971733                | -2.272541 | -0.096129 |
| 21               | 1                | 0              | 1.460017                | 1.995800  | 0.078506  |
| 22               | 1                | 0              | -0.971733               | 2.272541  | 0.096129  |
| 23               | 1                | 0              | -1.460017               | -1.995800 | -0.078506 |
| 24               | 6                | 0              | -2.852501               | 0.330334  | 0.018154  |
| 25               | 15               | 0              | -3.798510               | 1.781492  | 0.056789  |
| 26               | 6                | 0              | -5.271047               | 0.747303  | 0.032996  |
| 27               | 6                | 0              | -7.185305               | -1.293862 | -0.017036 |
| 28               | 6                | 0              | -4.912281               | -0.607024 | -0.002366 |
| 29               | 6                | 0              | -6.638577               | 1.072031  | 0.042869  |
| 30               | 6                | 0              | -7.581021               | 0.054411  | 0.017779  |
| 31               | 6                | 0              | -5.840941               | -1.642912 | -0.027571 |
| 32               | 1                | 0              | -6.953335               | 2.109129  | 0.069879  |
| 33               | 1                | 0              | -8.636773               | 0.299591  | 0.025235  |



|    |   |   |           |           |           |
|----|---|---|-----------|-----------|-----------|
| 34 | 1 | 0 | -5.516108 | -2.675701 | -0.054380 |
| 35 | 1 | 0 | -7.938209 | -2.073064 | -0.036011 |
| 36 | 8 | 0 | -3.566947 | -0.834796 | -0.010646 |

---

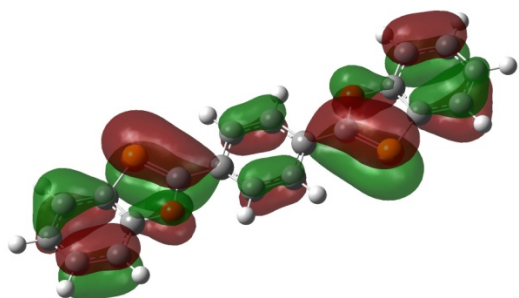

HOMO (-1)  
#88

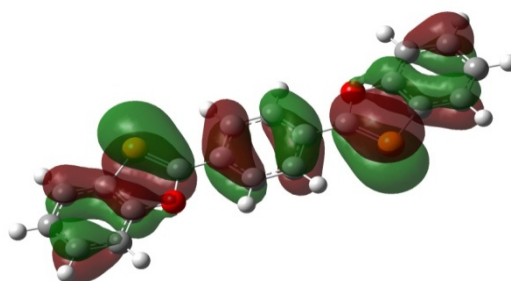

HOMO  
#89

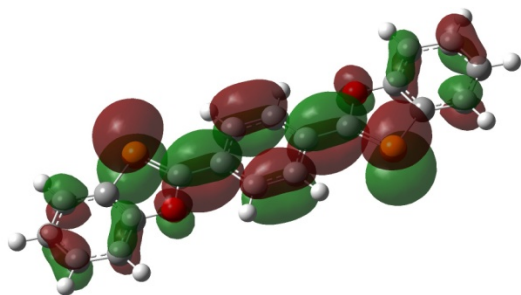

LUMO  
#90

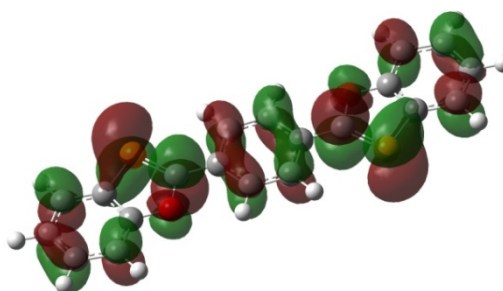

LUMO(+1)  
#91

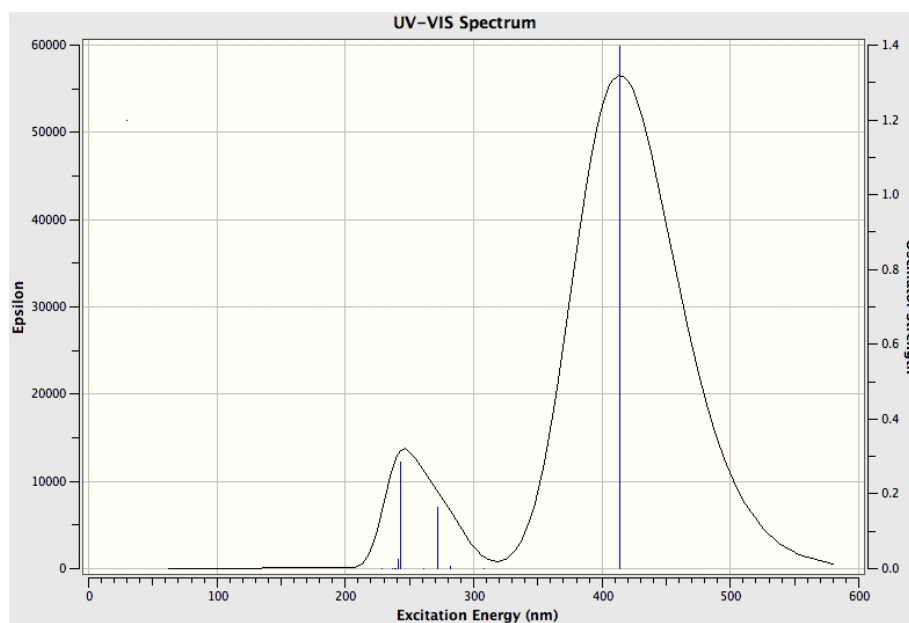

Excitation energies and oscillator strengths:

|                  |            |           |           |          |              |
|------------------|------------|-----------|-----------|----------|--------------|
| Excited State 1: | Singlet-AU | 2.9949 eV | 413.99 nm | f=1.3973 | <S**2>=0.000 |
| 88 -> 91         | -0.12139   |           |           |          |              |
| 89 -> 90         | 0.68772    |           |           |          |              |

This state for optimization and/or second-order correction.

Total Energy, E(TD-HF/TD-KS) = -1602.16657322

Copying the excited state density for this state as the 1-particle RhoCI density.

|                  |            |           |           |          |              |
|------------------|------------|-----------|-----------|----------|--------------|
| Excited State 2: | Singlet-AG | 4.0249 eV | 308.04 nm | f=0.0000 | <S**2>=0.000 |
| 88 -> 90         | 0.62369    |           |           |          |              |
| 89 -> 91         | -0.29120   |           |           |          |              |

|                  |            |           |           |          |              |
|------------------|------------|-----------|-----------|----------|--------------|
| Excited State 3: | Singlet-AU | 4.3931 eV | 282.23 nm | f=0.0067 | <S**2>=0.000 |
| 85 -> 90         | 0.45284    |           |           |          |              |
| 87 -> 90         | -0.35253   |           |           |          |              |
| 89 -> 92         | 0.33469    |           |           |          |              |
| 89 -> 93         | 0.12484    |           |           |          |              |

|                  |            |           |           |          |              |
|------------------|------------|-----------|-----------|----------|--------------|
| Excited State 4: | Singlet-AU | 4.5549 eV | 272.20 nm | f=0.1652 | <S**2>=0.000 |
| 85 -> 90         | 0.29342    |           |           |          |              |
| 86 -> 91         | -0.19927   |           |           |          |              |
| 87 -> 90         | 0.51481    |           |           |          |              |
| 88 -> 91         | 0.12552    |           |           |          |              |
| 89 -> 92         | 0.17698    |           |           |          |              |
| 89 -> 99         | 0.15778    |           |           |          |              |

|                  |            |           |           |          |              |
|------------------|------------|-----------|-----------|----------|--------------|
| Excited State 5: | Singlet-AG | 4.5559 eV | 272.14 nm | f=0.0000 | <S**2>=0.000 |
| 86 -> 90         | -0.40769   |           |           |          |              |
| 87 -> 91         | 0.22403    |           |           |          |              |
| 88 -> 90         | 0.22365    |           |           |          |              |
| 89 -> 91         | 0.42733    |           |           |          |              |

|                  |            |           |           |          |              |
|------------------|------------|-----------|-----------|----------|--------------|
| Excited State 6: | Singlet-AG | 4.7451 eV | 261.29 nm | f=0.0000 | <S**2>=0.000 |
| 84 -> 91         | 0.11990    |           |           |          |              |
| 86 -> 90         | 0.43929    |           |           |          |              |
| 87 -> 91         | -0.13454   |           |           |          |              |
| 88 -> 90         | 0.18148    |           |           |          |              |
| 89 -> 91         | 0.44434    |           |           |          |              |
| 89 -> 97         | 0.11426    |           |           |          |              |

|                  |            |           |           |          |              |
|------------------|------------|-----------|-----------|----------|--------------|
| Excited State 7: | Singlet-AU | 5.0981 eV | 243.20 nm | f=0.2835 | <S**2>=0.000 |
| 85 -> 90         | -0.37109   |           |           |          |              |
| 88 -> 94         | 0.14594    |           |           |          |              |

|                   |            |           |           |          |              |  |
|-------------------|------------|-----------|-----------|----------|--------------|--|
| 89 -> 92          | 0.55418    |           |           |          |              |  |
| Excited State 8:  | Singlet-AU | 5.1371 eV | 241.35 nm | f=0.0239 | <S**2>=0.000 |  |
| 81 -> 91          | -0.28656   |           |           |          |              |  |
| 82 -> 90          | 0.62505    |           |           |          |              |  |
| Excited State 9:  | Singlet-AU | 5.1822 eV | 239.25 nm | f=0.0012 | <S**2>=0.000 |  |
| 84 -> 90          | 0.17149    |           |           |          |              |  |
| 86 -> 94          | -0.15741   |           |           |          |              |  |
| 87 -> 90          | 0.11080    |           |           |          |              |  |
| 87 -> 99          | 0.13532    |           |           |          |              |  |
| 88 -> 91          | 0.18255    |           |           |          |              |  |
| 88 -> 94          | -0.14961   |           |           |          |              |  |
| 88 -> 97          | -0.22276   |           |           |          |              |  |
| 89 -> 93          | 0.47709    |           |           |          |              |  |
| 89 -> 99          | -0.16225   |           |           |          |              |  |
| Excited State 10: | Singlet-AG | 5.2021 eV | 238.34 nm | f=0.0000 | <S**2>=0.000 |  |
| 81 -> 90          | 0.61268    |           |           |          |              |  |
| 82 -> 91          | -0.31132   |           |           |          |              |  |
| Excited State 11: | Singlet-AG | 5.2445 eV | 236.41 nm | f=0.0000 | <S**2>=0.000 |  |
| 86 -> 93          | -0.11196   |           |           |          |              |  |
| 87 -> 97          | -0.10832   |           |           |          |              |  |
| 88 -> 93          | -0.28270   |           |           |          |              |  |
| 88 -> 99          | 0.11117    |           |           |          |              |  |
| 89 -> 94          | 0.55869    |           |           |          |              |  |
| 89 -> 97          | 0.13843    |           |           |          |              |  |
| Excited State 12: | Singlet-AG | 5.4298 eV | 228.34 nm | f=0.0000 | <S**2>=0.000 |  |
| 88 -> 96          | -0.18050   |           |           |          |              |  |
| 88 ->102          | 0.10115    |           |           |          |              |  |
| 89 -> 95          | 0.61184    |           |           |          |              |  |
| 89 -> 98          | 0.11199    |           |           |          |              |  |
| 89 ->104          | 0.11953    |           |           |          |              |  |

ii. "cis OSO" isomer of 3

| Center Number | Atomic Number | Atomic Type | Coordinates (Angstroms) |           |           |
|---------------|---------------|-------------|-------------------------|-----------|-----------|
|               |               |             | X                       | Y         | Z         |
| 1             | 1             | 0           | 0.000000                | 7.104565  | -0.860487 |
| 2             | 6             | 0           | 0.000000                | 6.433804  | -0.008789 |
| 3             | 6             | 0           | 0.000000                | 4.702926  | 2.230941  |
| 4             | 6             | 0           | 0.000000                | 5.041861  | -0.204143 |
| 5             | 6             | 0           | 0.000000                | 6.941304  | 1.282580  |
| 6             | 6             | 0           | 0.000000                | 6.082597  | 2.394869  |
| 7             | 6             | 0           | 0.000000                | 4.215908  | 0.928492  |
| 8             | 1             | 0           | 0.000000                | 8.014010  | 1.437634  |
| 9             | 1             | 0           | 0.000000                | 6.500168  | 3.394819  |
| 10            | 1             | 0           | 0.000000                | 4.023521  | 3.074214  |
| 11            | 15            | 0           | 0.000000                | 4.051464  | -1.708153 |
| 12            | 6             | 0           | 0.000000                | 2.641306  | -0.695333 |
| 13            | 8             | 0           | 0.000000                | 2.878118  | 0.651476  |
| 14            | 6             | 0           | 0.000000                | 1.252903  | -1.055912 |
| 15            | 6             | 0           | 0.000000                | 0.701124  | -2.328052 |
| 16            | 1             | 0           | 0.000000                | 1.301990  | -3.227882 |
| 17            | 6             | 0           | 0.000000                | -0.701124 | -2.328052 |
| 18            | 1             | 0           | 0.000000                | -1.301990 | -3.227882 |
| 19            | 6             | 0           | 0.000000                | -1.252903 | -1.055912 |
| 20            | 16            | 0           | 0.000000                | 0.000000  | 0.165534  |
| 21            | 6             | 0           | 0.000000                | -2.641306 | -0.695333 |
| 22            | 8             | 0           | 0.000000                | -2.878118 | 0.651476  |
| 23            | 6             | 0           | 0.000000                | -4.215908 | 0.928492  |
| 24            | 6             | 0           | 0.000000                | -6.941304 | 1.282580  |
| 25            | 6             | 0           | 0.000000                | -4.702926 | 2.230941  |
| 26            | 6             | 0           | 0.000000                | -5.041861 | -0.204143 |
| 27            | 6             | 0           | 0.000000                | -6.433804 | -0.008789 |
| 28            | 6             | 0           | 0.000000                | -6.082597 | 2.394869  |
| 29            | 1             | 0           | 0.000000                | -4.023521 | 3.074214  |
| 30            | 1             | 0           | 0.000000                | -7.104565 | -0.860487 |
| 31            | 1             | 0           | 0.000000                | -6.500168 | 3.394819  |
| 32            | 1             | 0           | 0.000000                | -8.014010 | 1.437634  |
| 33            | 15            | 0           | 0.000000                | -4.051464 | -1.708153 |

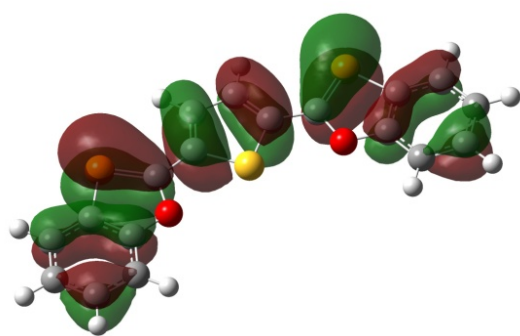

HOMO(-1)  
#89

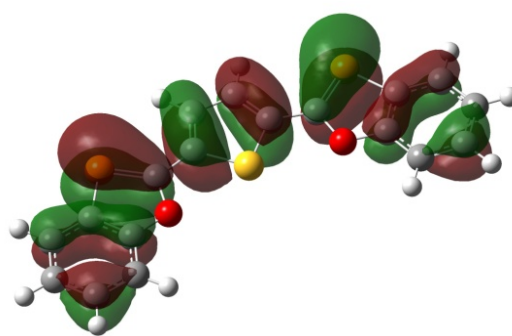

HOMO  
#90

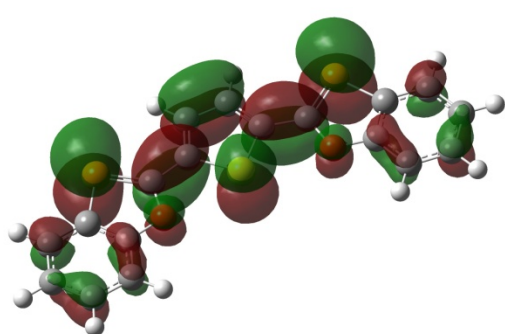

LUMO  
#91

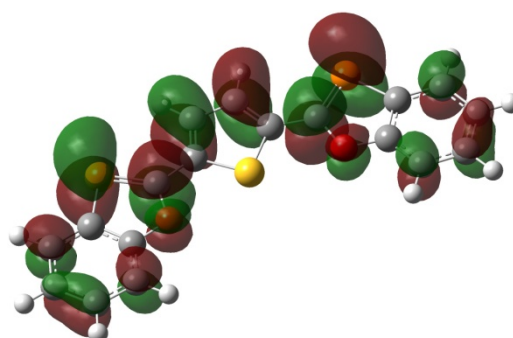

LUMO(+1)  
#92

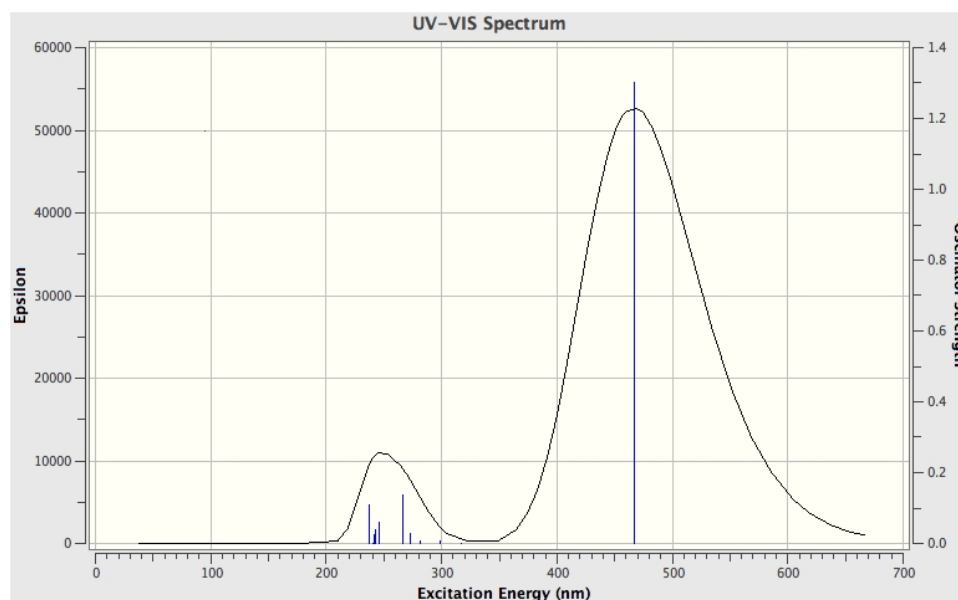

Excitation energies and oscillator strengths:

Excited State 1: Singlet-B2 2.6566 eV 466.71 nm  $f=1.3020$   $\langle S^2 \rangle=0.000$

90 -> 91            0.69358

This state for optimization and/or second-order correction.

Total Energy, E(TD-HF/TD-KS) = -1922.98305625

Copying the excited state density for this state as the 1-particle RhoCI density.

Excited State 2:        Singlet-A1        3.9125 eV   316.89 nm   f=0.0000   <S\*\*2>=0.000  
89 -> 91            0.58985  
90 -> 92            -0.35709

Excited State 3:        Singlet-A1        4.1536 eV   298.50 nm   f=0.0053   <S\*\*2>=0.000  
86 -> 91            0.21368  
87 -> 91            -0.13459  
88 -> 92            0.10528  
89 -> 91            0.33619  
90 -> 92            0.53201

Excited State 4:        Singlet-B2        4.3988 eV   281.86 nm   f=0.0062   <S\*\*2>=0.000  
87 -> 92            -0.18002  
88 -> 91            0.64089  
89 -> 92            0.13068  
90 -> 97            0.11101

Excited State 5:        Singlet-A1        4.5485 eV   272.58 nm   f=0.0282   <S\*\*2>=0.000  
85 -> 92            0.10535  
86 -> 91            -0.18201  
87 -> 91            0.58727  
88 -> 92            -0.15668  
90 -> 92            0.20665  
90 -> 98            0.11418

Excited State 6:        Singlet-A1        4.6589 eV   266.12 nm   f=0.1358   <S\*\*2>=0.000  
86 -> 91            0.62877  
87 -> 91            0.17608  
88 -> 92            -0.10869  
90 -> 92            -0.12917

Excited State 7:        Singlet-B2        5.0448 eV   245.77 nm   f=0.0579   <S\*\*2>=0.000  
85 -> 91            -0.16342  
87 -> 94            0.14333  
88 -> 97            -0.12510  
89 -> 92            -0.15929  
89 -> 94            0.16863  
89 -> 98            0.15921  
90 -> 93            0.54700

|                   |            |           |           |          |              |  |
|-------------------|------------|-----------|-----------|----------|--------------|--|
| 90 -> 97          | 0.14587    |           |           |          |              |  |
| Excited State 8:  | Singlet-A1 | 5.0985 eV | 243.18 nm | f=0.0383 | <S**2>=0.000 |  |
| 87 -> 93          | 0.12821    |           |           |          |              |  |
| 89 -> 93          | 0.25079    |           |           |          |              |  |
| 90 -> 94          | 0.59843    |           |           |          |              |  |
| 90 -> 98          | 0.11344    |           |           |          |              |  |
| Excited State 9:  | Singlet-B1 | 5.1312 eV | 241.63 nm | f=0.0241 | <S**2>=0.000 |  |
| 82 -> 92          | -0.27935   |           |           |          |              |  |
| 83 -> 91          | 0.62606    |           |           |          |              |  |
| Excited State 10: | Singlet-A2 | 5.1321 eV | 241.59 nm | f=0.0000 | <S**2>=0.000 |  |
| 82 -> 91          | 0.37703    |           |           |          |              |  |
| 83 -> 92          | -0.17314   |           |           |          |              |  |
| 90 -> 95          | 0.48313    |           |           |          |              |  |
| 90 -> 99          | -0.21772   |           |           |          |              |  |
| Excited State 11: | Singlet-A2 | 5.1527 eV | 240.62 nm | f=0.0000 | <S**2>=0.000 |  |
| 82 -> 91          | 0.49467    |           |           |          |              |  |
| 83 -> 92          | -0.22640   |           |           |          |              |  |
| 90 -> 95          | -0.33195   |           |           |          |              |  |
| 90 -> 99          | 0.23915    |           |           |          |              |  |
| Excited State 12: | Singlet-B2 | 5.2143 eV | 237.78 nm | f=0.1104 | <S**2>=0.000 |  |
| 85 -> 91          | 0.35356    |           |           |          |              |  |
| 87 -> 92          | 0.11880    |           |           |          |              |  |
| 88 -> 91          | 0.12448    |           |           |          |              |  |
| 88 -> 93          | -0.13416   |           |           |          |              |  |
| 89 -> 92          | 0.10407    |           |           |          |              |  |
| 89 -> 94          | 0.21066    |           |           |          |              |  |
| 89 -> 98          | -0.17560   |           |           |          |              |  |
| 90 -> 93          | 0.30670    |           |           |          |              |  |
| 90 -> 97          | -0.33905   |           |           |          |              |  |

## 7. References

1. (a)A. M. C. H. van den Nieuwendijk, D. Pietra, L. Heitman, A. Göeblyös and A. P. IJzerman, *J. Med. Chem.*, 2004, **47**, 663-672. (b)R. Seto, T. Kojima, K. Hosokawa, Y. Koyama, G. Konishi and T. Takata, *Polymer*, 2010, **51**, 4744-4749.
2. S. Wu, N. Deligonal and J. D. Protasiewicz, *Dalton. Trans.*, 2013, **42**, 14866-14874.
3. J. N. Demas and G. A. Crosby, *J. Phys. Chem.*, 1971, **75**, 991-1024.
4. M. J. Frisch, G. W. Trucks, H. B. Schlegel, G. E. Scuseria, M. A. Robb, J. R. Cheeseman, G. Scalmani, V. Barone, B. Mennucci, G. A. Petersson, H. Nakatsuji, M. Caricato, X. Li, H. P. Hratchian, A. F. Izmaylov, J. Bloino, G. Zheng, J. L. Sonnenberg, M. Hada, M. Ehara, K. Toyota, R. Fukuda, J. Hasegawa, M. Ishida, T. Nakajima, Y. Honda, O. Kitao, H. Nakai, T. Vreven, J. A. Montgomery, Jr., J. E. Peralta, F. Ogliaro, M. Bearpark, J. J. Heyd, E. Brothers, K. N. Kudin, V. N. Staroverov, R. Kobayashi, J. Normand, K. Raghavachari, A. Rendell, J. C. Burant, S. S. Iyengar, J. Tomasi, M. Cossi, N. Rega, J. M. Millam, M. Klene, J. E. Knox, J. B. Cross, V. Bakken, C. Adamo, J. Jaramillo, R. Gomperts, R. E. Stratmann, O. Yazyev, A. J. Austin, R. Cammi, C. Pomelli, J. W. Ochterski, R. L. Martin, K. Morokuma, V. G. Zakrzewski, G. A. Voth, P. Salvador, J. J. Dannenberg, S. Dapprich, A. D. Daniels, Ö. Farkas, J. B. Foresman, J. V. Ortiz, J. Cioslowski, and D. J. Fox, *Gaussian 09 (Revision D.01)*, Gaussian Inc., Wallingford, CT, 2009.
